# Supplementary material for: INDs for PET Molecular Imaging Probes—Approach by an Academic Institution
Source: PubMed Central journal article supplement (PMC4097325; doi:10.1007/s11307-014-0735-2), 2014-04-15
Supplement: 11307_2014_735_MOESM1_ESM.pdf [file 11307_2014_735_MOESM1_ESM.pdf]

## Supplemental Material

### INDs for PET molecular imaging probes- approach by an academic institution

#### Molecular Imaging and Biology

Sherly Mosessian<sup>1</sup>, Sandra M. Duarte-Vogel<sup>2</sup>, David B. Stout<sup>1,3</sup>, Kenneth P. Roos<sup>4</sup>, Gregory W. Lawson<sup>2</sup>, Maria C. Jordan<sup>4</sup>, Amanda Ogden<sup>2</sup>, Cheryl Matter<sup>1</sup>, Saman Sadeghi<sup>1,5</sup>, George Q. Mills<sup>6</sup>, Heinrich R. Schelbert<sup>1</sup>, Caius G. Radu<sup>1,5</sup>, Johannes Czernin<sup>1,5</sup>, Marcelo Couto<sup>2</sup>, Michael E. Phelps<sup>1,3,5</sup>.

<sup>1</sup>Department of Molecular and Medical Pharmacology, David Geffen School of Medicine at University of California Los Angeles, Los Angeles, CA, USA

<sup>2</sup>Division of Laboratory Animal Medicine, David Geffen School of Medicine at University of California Los Angeles, Los Angeles, CA, USA

<sup>3</sup>Crump Institute for Molecular Imaging, David Geffen School of Medicine at University of California Los Angeles, Los Angeles, CA, USA

<sup>4</sup>Department of Physiology, David Geffen School of Medicine at University of California Los Angeles, CA, USA

<sup>5</sup>Ahmanson Translational Imaging Division, David Geffen School of Medicine at University of California Los Angeles, Los Angeles, CA, USA

<sup>6</sup>Perceptive Informatics/Parexel, Gaithersburg, MD, USA

Corresponding author: Sherly Mosessian Ph.D, University of California, Los Angeles, Department of Molecular and Medical Pharmacology, 650 Charles E. Young Dr. South, CHS 23-148, Los Angeles, CA 90095. Phone:(310) 267-1188; Email: smosessian@mednet.ucla.edu

## **MATERIALS AND METHODS**

### **Study subjects**

Adult female (200-220g) and male (300-320g) CrI:CD@SDIGSBR (Sprague-Dawley) rats purchased from Charles River Laboratories, Inc., Wilmington, MA, were used for this study. A total of 64 rats (32 male and 32 female) were assigned to eight groups composed of four male and four female rats in each group. Only rats that appeared healthy were selected for the study. Prior to the beginning of the study, the rats were assigned to one of the eight groups based on random number generation.

Bias was controlled by randomization and by blinding of the study to the technicians who administered the test substance and performed clinical observations of the animals, and to the pathologist evaluating the rats at necropsy and histopathology. The identity of the animal group assignment was not available to the dosing technician, or to the pathologist performing necropsies and histopathology, until the results were collected.

### **Animal husbandry**

Rats were single housed, in a dedicated room, in clear LPI polycarbonate solid bottom microisolator cages; dimensions 19Lx10 1/2Wx8H; floor space: 143 square inches.

Cages with Alpha-dri bedding were changed a minimum of twice per week or if the bedding became excessively wet or soiled, to keep the animals dry and clean. The animal room was independently supplied with at least 10 changes per hour of 100% fresh air. Room temperature was maintained between 71.8-76.8°F, monitored and recorded daily. Room humidity was maintained between 34-60% and was also monitored and recorded daily. An automatically-controlled 12-hour light:12-hour dark fluorescent light cycle was maintained. Each dark period began at 18:00 hrs PST.

Rats were fed ad libitum, Certified Rodent Diet(R) #5002 (LabDiet. PMI Nutrition International). Rats were provided ad libitum RO (Reverse Osmosis) water from individual bottles attached to the cages throughout their stay in the Testing Facility. UCLA maintains AAALAC accredited animal facilities and all work was conducted under authorization by the UCLA Animal Research Committee (IACUC equivalent).

### **Test substance**

Non-radioactive FAC compounds were purchased from Moravek Biochemicals and Radiochemicals (Brea, CA) and dissolved in 1% ethanol in saline. The technician administering the test substance was blinded as to the identity of the animals. A single 100 $\mu$ l volume dose of either the control (only the carrier solution of 1% ethanol in saline) or 27.5 $\mu$ g of non-radioactive FAC per kilogram of body weight was administered intravenously to the rats. This is equivalent to 0 or 100X the maximum tracer mass of FAC administered to human subjects, respectively.

### **Physiological assessments**

Acute arterial blood pressure measurements were obtained via femoral or carotid artery catheterizations to determine the hemodynamic status of the isoflurane anesthetized rats. The Electrocardiogram (ECG) was simultaneously recorded via needle electrodes inserted under the skin in the lead II configuration. These pressure and ECG data were acquired via Grass amplifiers, then digitized, displayed and analyzed in real time with HEM V4.0 software (Notocord Systems, France) on a PC. Heart rates were determined from the R-R interval of the ECG. The oxygen saturation was monitored simultaneously with a MouseOx system and displayed with WinDaq software on the same PC. Baseline data was recorded continuously for at least 15-30 minutes to ensure that physiological levels of pressures, oxygen saturation and heart rates were achieved.

### **Blood collection**

Approximately 1.0-1.5 ml of whole blood were collected by caudal lateral vein bleed under isoflurane anesthesia from rats in groups 1-4 to determine baseline values at the end of the acclimation period (day -1). Subsequent blood samples were collected terminally before pentobarbital overdose euthanasia at day +1 (groups 1-4) and day +14 (groups 5-8) just prior to euthanasia and necropsy, as shown in figure S1. The whole blood samples were divided as follows: at least 350  $\mu$ L into an EDTA-containing tube (submitted for hematology [CBC, complete blood count]) and 0.5-1.0 mL into a serum-separator tube for blood chemistries. Samples in serum-separator tubes were centrifuged at 2000 x g for 15 minutes after clotting. The serum was evaluated for hemolysis according to colorimetric scale. Hemolysis was acceptable in the range of 20-50, according to the scale. Samples collected for CBC were assessed before running the test for clots. Smears were prepared in the diagnostic lab and read by a pathologist if the CBC equipment (HemoVet) flagged the results.

### **Euthanasia and necropsy**

At scheduled times; blood was collected under general anesthesia using a 24G catheter placed in the lateral caudal vein. Using the same intravenous catheter, animals were euthanized with 100mg/kg pentobarbital. Immediately after euthanasia necropsies were conducted by a pathologist.

### **Gross necropsy and histopathology**

Each rat was weighed on a calibrated, digital scale immediately upon euthanasia and before necropsy. A complete necropsy was performed on each rat and all gross lesions were recorded. Additionally, the following organs were weighed and recorded for comparison between the treated and non-treated groups: brain, heart, thymus, liver, spleen, right and left kidney, and testes when applicable. Samples of all of the organs were collected for histologic examination. All tissues were immersed in 10% formalin immediately after collection. The tissues were sectioned for paraffin embedding within 24-48 hours post fixation. The UCLA-DLAM staff

veterinary pathologist performed or directly supervised all tissue sectioning. The staff veterinary pathologist performed all histopathologic evaluations for this study.

Gross necropsy included an initial physical examination of external surfaces and all orifices. A skin incision was made extending from the mandible through the anogenital region. The incision was extended through the subcutaneous tissues and muscular layers. An internal examination of tissues and organs in situ was performed. The following was examined: external and internal portions of all hollow organs; the external surfaces of the brain and spinal column, the nasal cavity and neck with associated organs and tissues; the thoracic, abdominal and pelvic cavities with associated organs and tissues; and the musculoskeletal carcass. The lungs were perfused with neutral buffered 10% formalin. The entire carcass was fixed in 10% formalin post necropsy and filed for future sectioning if needed.

## **RESULTS**

### **Study plan**

Sprague-Dawley rats were randomly assigned to eight groups of eight rats (four male and four female rats in each group) to determine the safety pharmacology and toxicity effects upon one, single, intravenous administration of non-radioactive form of each of the FAC PET probe analogs in rats (**Figure S1**). The rats were monitored prior and up to 14 days following the administration of the test substance (carrier solution or FAC). The early effects of the administered agents were monitored on day (+1) post injection in groups 1-4 and the late effects of the administered agents were monitored on day (+14) post injection in groups 5-8. Rats in groups 1/5 were administered with the carrier solution control and those in groups 2/6, groups 3/7 and groups 4/8 were administered with the test agents D-[<sup>19</sup>F]-FAC, L-[<sup>19</sup>F]-FAC and L-[<sup>19</sup>F]-FMAC respectively.

The dose of each FAC agent used for these toxicity studies was in excess of 100x the maximum estimated dose of the FAC tracer that may be injected into a human subject, equivalent to 27.5ug per kg. The control groups received the carrier solution instead.

### **Safety pharmacology**

The safety pharmacology parameters evaluated during the study included, body weight, body temperature, heart rate, blood pressure, blood oxygen levels, respiration rate and daily clinical observations.

Body weight: Rats were purchased from Charles River Laboratories with average weights of 200-220grams and 300-320grams for female and male rats respectively. Body weight measurements were taken on days -1, 0, +1, +7 and +14 and averaged for males and females in vehicle control (groups 1 and 5), D-FAC (groups 2 and 6), L-FAC (groups 3 and 7) and L-FMAC (groups 4 and 8) administered rats. The results demonstrated no significant body weight

difference in D-FAC, L-FAC, L-FMAC male or female rats compared to the control groups along the course of the study (**Figure S2 A, B and C**).

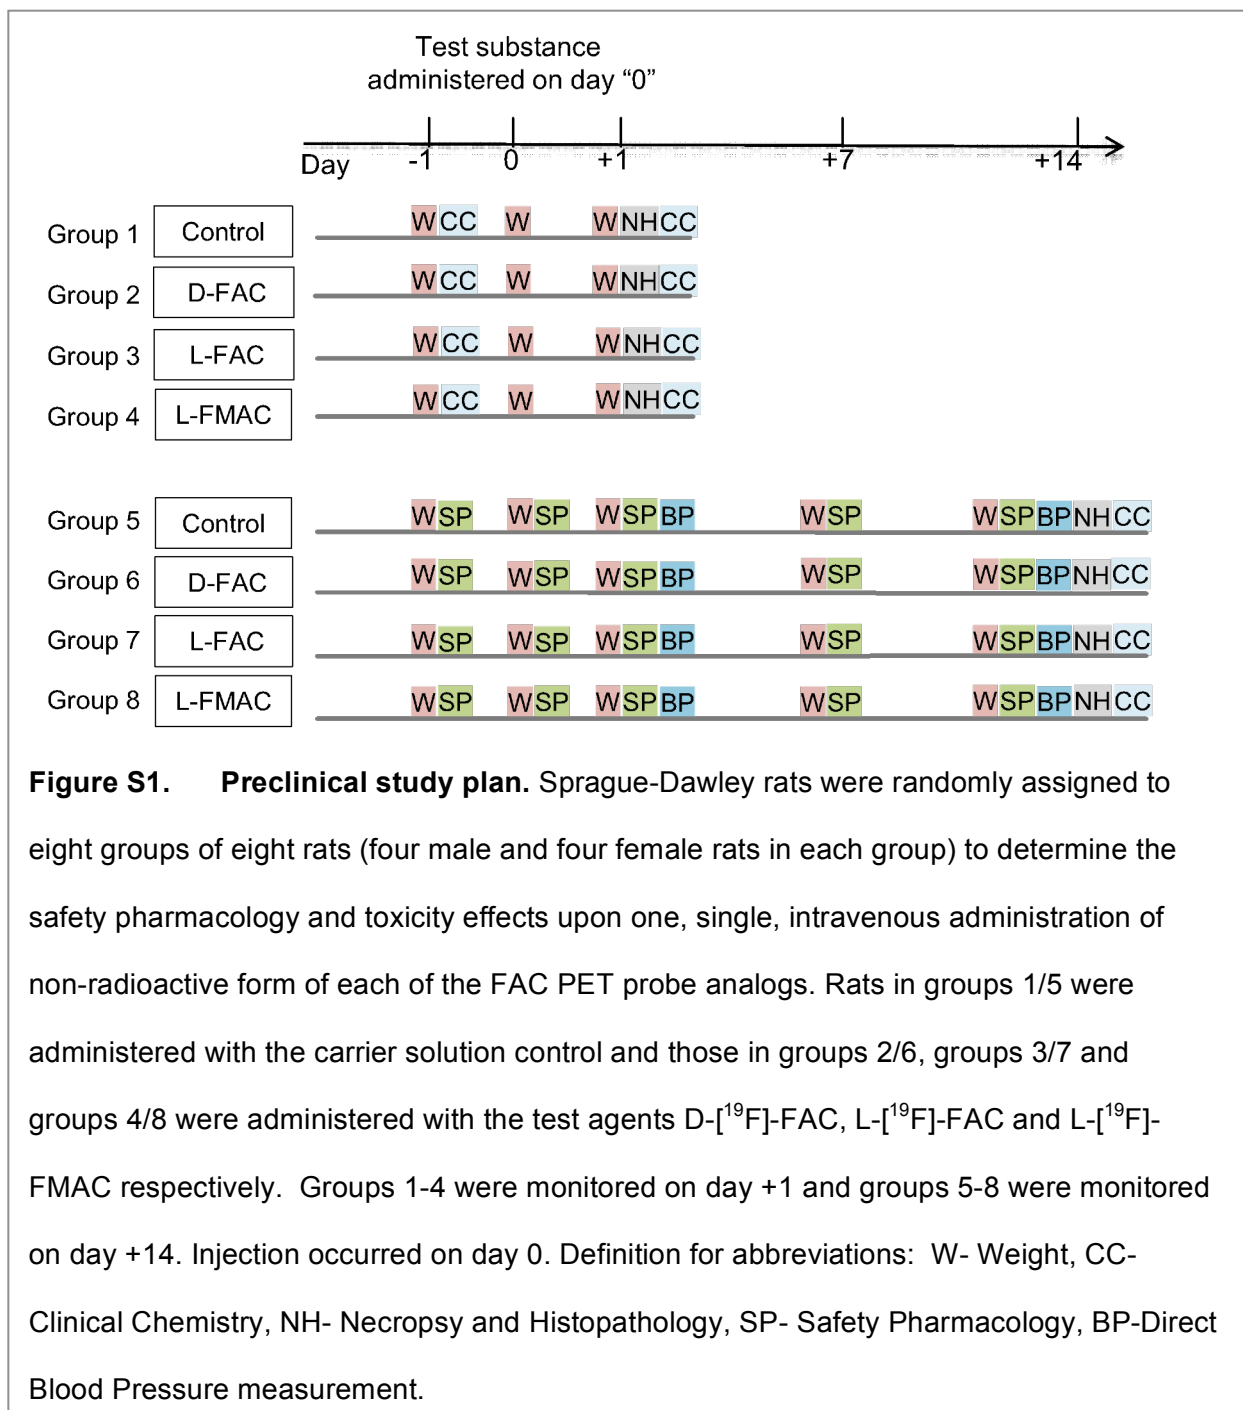

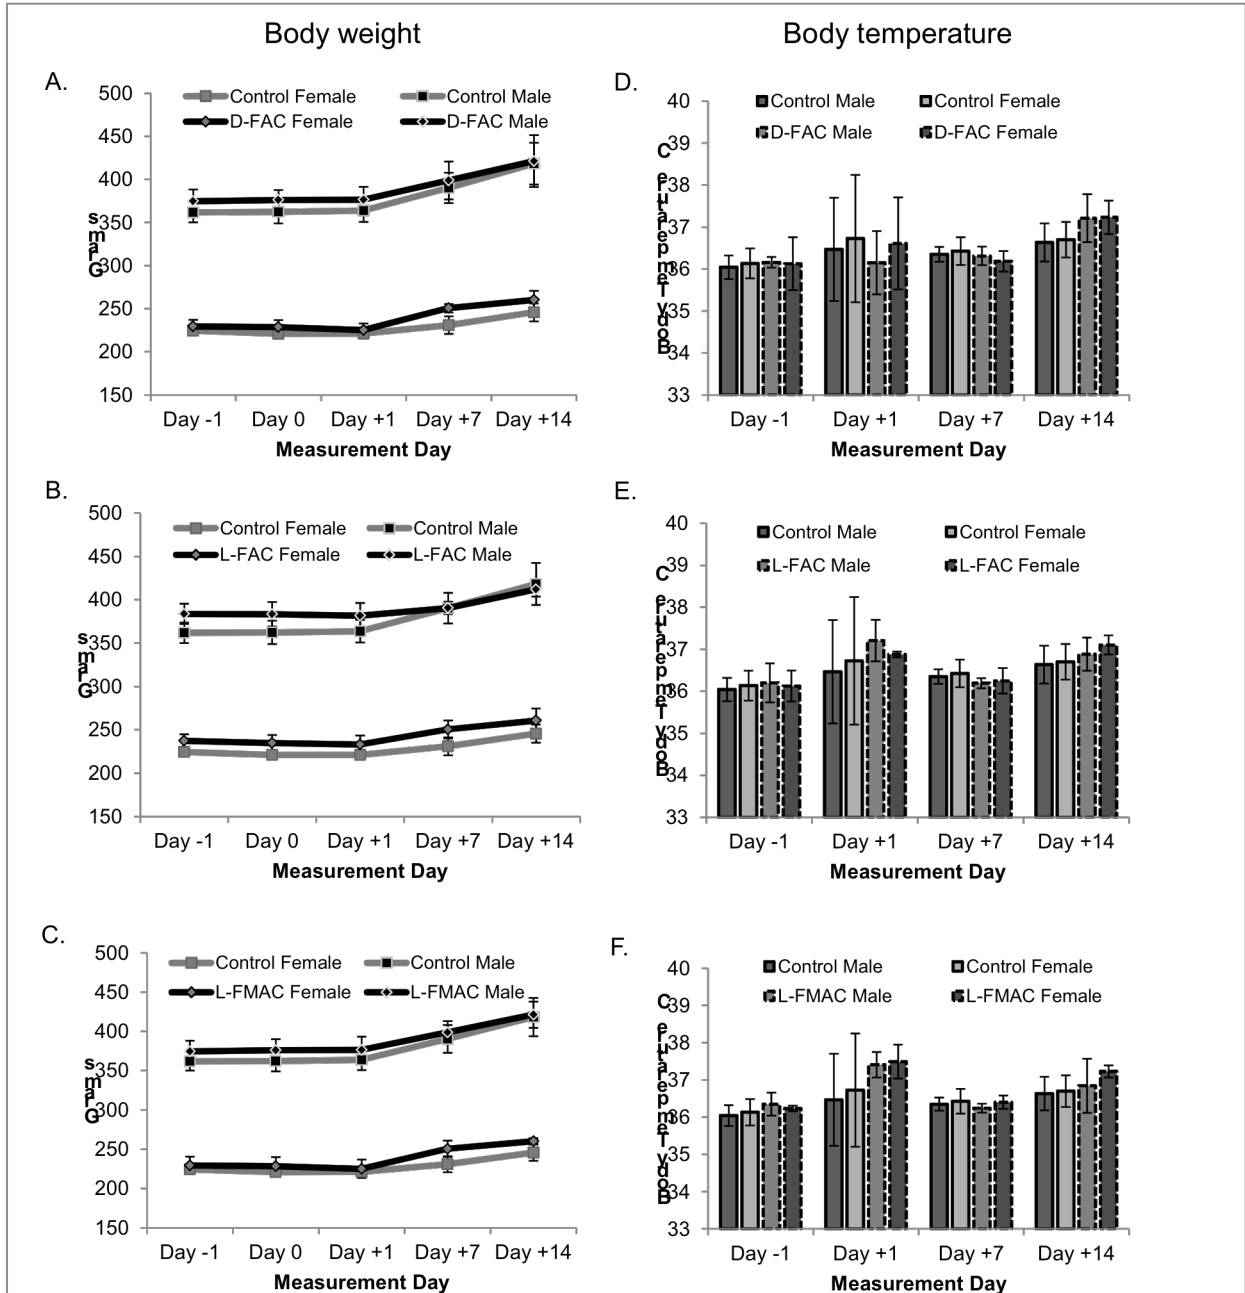

**Figure S2. Body weight and temperature measurements.** (A-C) Body weight measurements were taken on days -1, 0, +1, +7 and +14 and averaged for males and females in vehicle control, D-FAC (A), L-FAC (B) and L-FMAC (C) administered rats. (D-E) Rectal body temperatures were recorded on days -1, +1, +7 and +14 for males and females in the vehicle control, D-FAC (D), L-FAC (E) and L-FMAC (F) administered rats. Standard deviations were calculated and incorporated in the graphs.



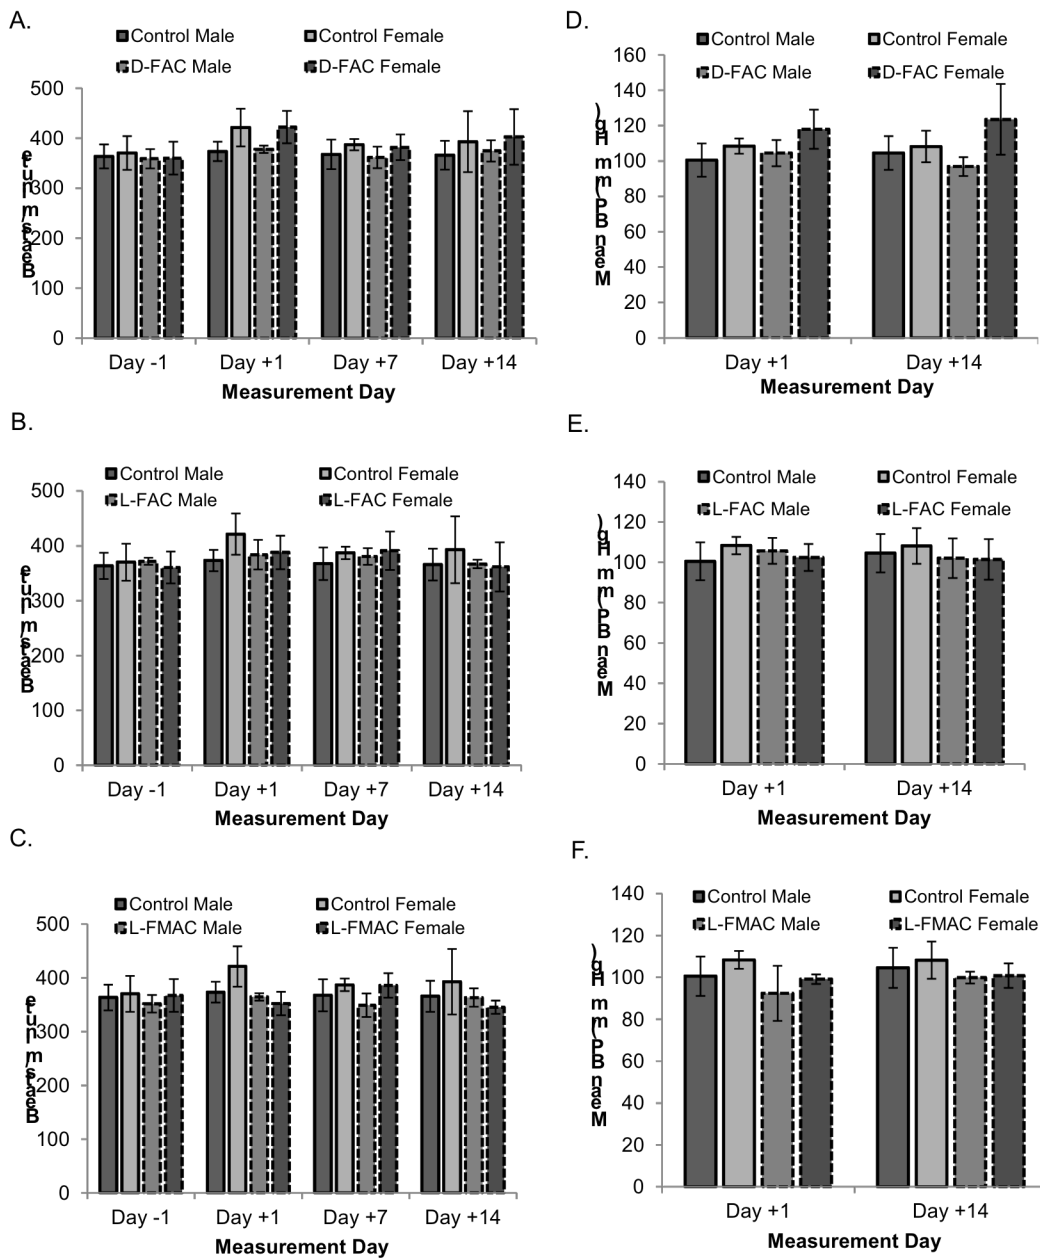

**Figure S3. Heart rate and mean blood pressure measurements. (A-C)**

Electrocardiogram (ECG) traces were recorded on days -1, +1, +7 and +14 for males and females in the vehicle control, D-FAC (A), L-FAC (B) and L-FMAC (C) administered rats. (D-F) Mean blood pressure measurements, from the femoral artery, were obtained on days +1 and +14 from males and females for vehicle control, D-FAC (D), L-FAC (E) and L-FMAC (F) administered rats.

Body temperature: Rectal body temperatures were recorded on days -1, +1, +7 and +14 for males and females in the vehicle control (group 5), D-FAC (group 6), L-FAC (group 7) and L-FMAC (group 8) administered rats. The average body temperature results ranged during the course of the study as follows: 36.0-36.7 (Vehicle Control), 36.2-37.2 (D-FAC), 36.1-37.2 (L-FAC) and 36.2-37.5 (L-FMAC). The standard deviation calculations demonstrated no significant difference in body temperatures in D-FAC, L-FAC, L-FMAC male or female rates compared to the control groups (**Figure S2 D, E and F**).

Cardiovascular parameters: ECG traces were recorded on days -1, +1, +7 and +14 for males and females in the vehicle control (group 5), D-FAC (group 6), L-FAC (group 7) and L-FMAC (group 8) administered rats. Heart rate measurements ranged during the course of the study as follows: 364-421 beats per minute (bpm) (Vehicle Control), 360-422 bpm (D-FAC), 360-388 bpm (L-FAC) and 352-386 bpm (L-FMAC). The standard deviation calculations and ECG traces demonstrated that the control and test article injected male and female rats displayed normal heart rates (**Figure S3 A, B, and C**), ECG waves and rhythm.

Blood pressure (BP): Direct BP measurements, from the femoral artery were obtained on days +1 and +14 from males and females in groups 5-8. Mean BP (**Figure S3 D, E and F**), Systolic BP (**Figure S4 A, B and C**) and Diastolic BP (**Figure S4 D, E and F**) measurements were calculated and displayed no significant differences between control and test article administered rats on days +1 and +14.

Pulse oximetry and respiration rate: Hemoglobin oxygen saturation levels and respiration rates for groups 5-8 were obtained on days -1, +1, +7 and +14. The average percent blood oxygen level of all the rats were 99-100% and considered normal (**Figure S5 A, B and C**). No significant changes were observed in the respiration rates (**Figure S5 D, E and F**) between the control and the test article administered groups.

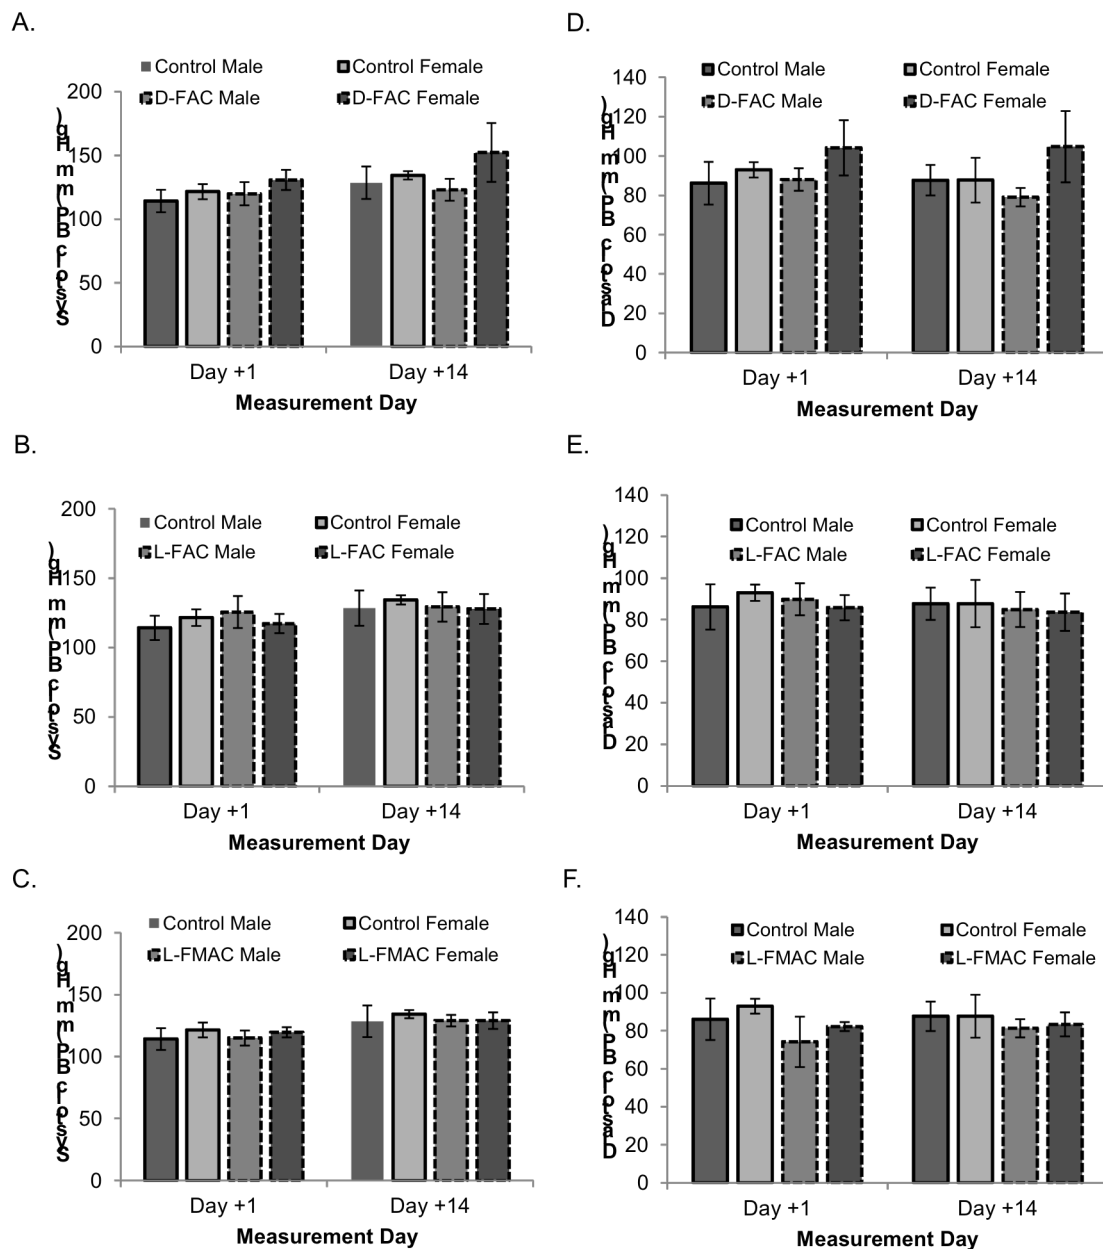

**Figure S4. Systolic and diastolic blood pressure measurements.** Systolic (A-C) and diastolic (D-E) blood pressure measurements, from the femoral artery, were obtained on days +1 and +14 from males and females for vehicle control, D-FAC (A and D), L-FAC (C and E) and L-FMAC (D and F) administered rats.

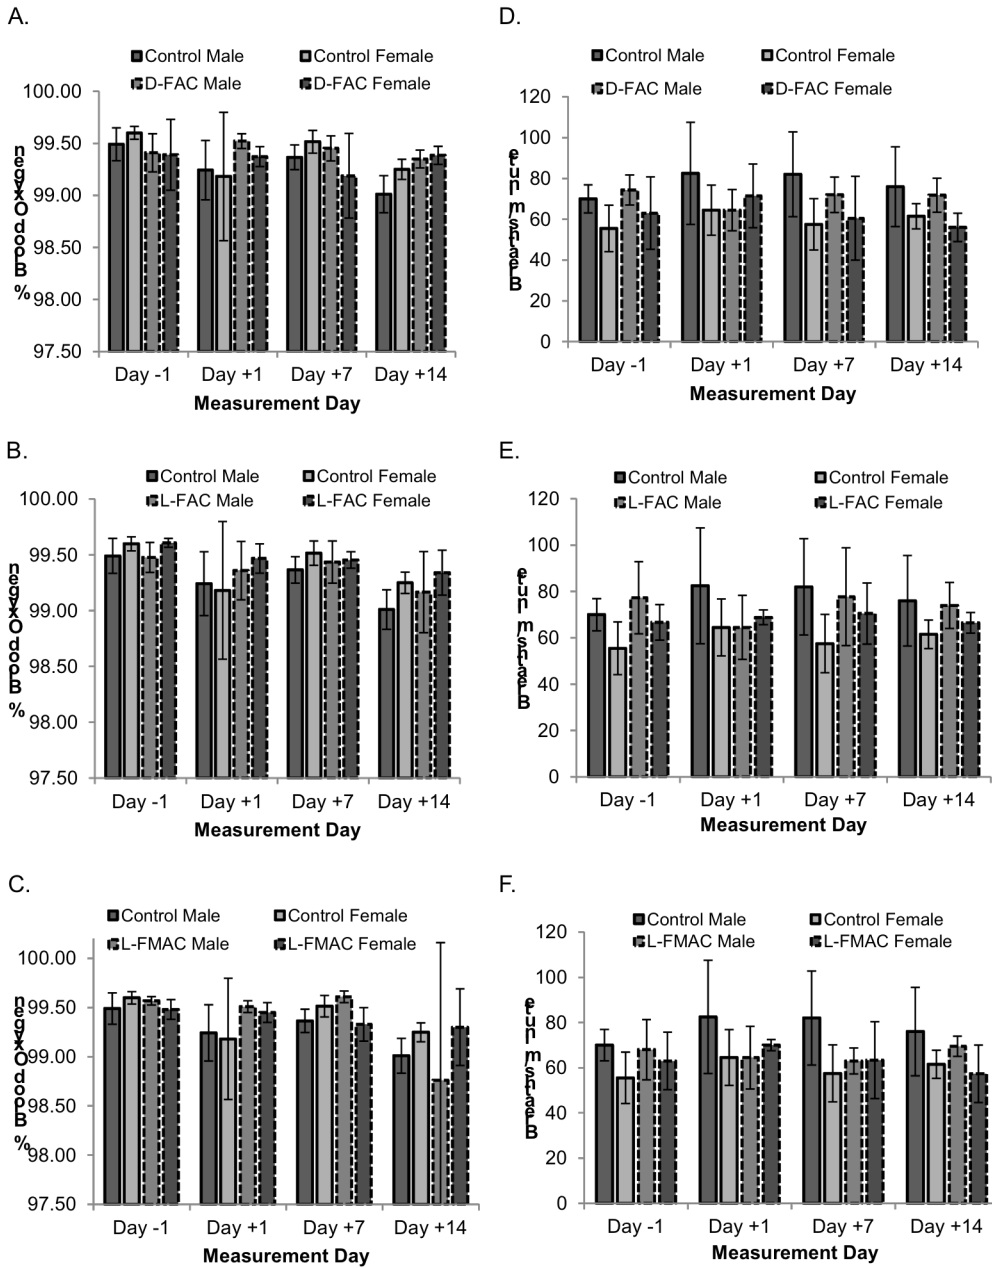

**Figure S5. Pulse oximetry and respiration rate measurements.** Hemoglobin oxygen saturation levels (A-C) and respiration rates (D-F) were obtained on days -1, +1, +7 and +14 from males and females for vehicle control, D-FAC (A and D), L-FAC (C and E) and L-FMAC (D and F) administered rats.

Clinical observations: All the rats involved in the study were monitored daily for clinical signs. No clinical signs linked to the administration of the FAC test substance were observed.

### **Toxicology studies**

The early toxicity (day +1) and late toxicity (day +14) of the agents were determined by obtaining complete blood counts (CBC), clinical chemistry, necropsy and histopathology data in rats from groups 1-4 and 6-8 respectively.

CBC: The CBC results for each group under early (**Table S1A**) and late time points (**Table S1B**) were averaged and the standard deviations displayed. The standard deviations with a  $p < 0.05$  compared to the same sex controls under respective early or late time points are annotated with an asterisk and highlighted.

Serum chemistry: The serum chemistry results for each group under early (**Table S2A**) and late time points (**Table S2B**) were averaged and the standard deviations displayed. The standard deviations with a  $p < 0.05$  compared to the same sex controls under respective early or late time points are annotated with an asterisk and highlighted.

Necropsy: The necropsy data results for each group under early (**Table S3A**) and late time points (**Table S3B**) were averaged and the standard deviations displayed. The standard deviations with a  $p < 0.05$  compared to the same sex controls under respective early or late time points are annotated with an asterisk and highlighted.

A significant change was detected in the heart weight ( $P < 0.05$ ) of male and female D-FAC treated groups. Once the data had been presented to the FDA, we were requested to conduct a second toxicity study for the D-FAC group. The heart weight measurements from 6 male and female rats were obtained and the results are displayed in tables S3A and S3B under "Heart Wt 2". As shown, the expanded toxicity study revealed that no changes were observed in the heart weight for the D-FAC administered group compared to its respective control.

Histopathology: Histopathology analysis was performed on tissues obtained from all rats after necropsy on days +1 and +14. The following tissues were examined histologically in addition to any gross lesions: Salivary glands, peripheral and mesenteric lymph nodes, brain (brainstem, cerebellum, mid cerebrum and olfactory), pancreas, thyroid, trachea, esophagus, thymus, heart, lung, kidney, liver, spleen, stomach, duodenum, jejunum, ileum, cecum, colon, reproductive tract (ovary, uterus; testis, seminal vesicles, prostate), bladder, haired skin and skeletal muscle (quadriceps). No significant changes in histopathology findings were observed in the FAC injected group compared to the control.

| A.                 | Group 1       |         | Group 2     |         | Group 3     |         | Group 4      |         |
|--------------------|---------------|---------|-------------|---------|-------------|---------|--------------|---------|
|                    | Control early |         | D-FAC early |         | L-FAC early |         | L-FMAC early |         |
| Male               | Mean          | SD      | Mean        | SD      | Mean        | SD      | Mean         | SD      |
| WBC (Thousands/uL) | 14.100        | 3.389   | 12.167      | 1.784   | 17.340      | 5.358   | 17.830       | 2.849   |
| Neutrophil (#)     | 5.090         | 1.048   | 5.127       | 1.011   | 5.383       | 1.770   | 6.203        | 1.204   |
| Neutrophil (%)     | 36.620        | 4.827   | 41.923      | 1.999   | 30.985      | 1.602   | 34.895       | 4.730   |
| Lymphocytes (#)    | 8.330         | 2.454   | 6.287       | 0.696   | 11.013      | 3.300   | 10.795       | 2.092   |
| Lymphocytes (%)    | 58.528        | 5.770   | 51.893      | 3.720   | 63.625      | 2.109   | 60.488       | 4.863   |
| Monocytes (#)      | 0.660         | 0.228   | 0.743       | 0.326   | 0.893       | 0.326   | 0.800        | 0.291   |
| Monocytes (%)      | 4.703         | 1.488   | 6.053       | 2.640   | 5.120       | 0.867   | 4.465        | 1.491   |
| Eosinophils (#)    | 0.023         | 0.019   | 0.013       | 0.015   | 0.043       | 0.033   | 0.015        | 0.013   |
| Eosinophils (%)    | 0.133         | 0.088   | 0.100       | 0.125   | 0.220       | 0.146   | 0.095        | 0.095   |
| Basophils (#)      | 0.003         | 0.005   | 0.003       | 0.006   | 0.010       | 0.008   | 0.010        | 0.000*  |
| Basophils (%)      | 0.023         | 0.021   | 0.030       | 0.036   | 0.055       | 0.052   | 0.058        | 0.028   |
| RBC (Million/uL)   | 7.148         | 0.892   | 6.983       | 0.301   | 6.623       | 0.447   | 7.260        | 0.237   |
| HB (g/dL)          | 14.150        | 1.162   | 14.567      | 0.737   | 12.825      | 0.506   | 14.550       | 0.493   |
| HCT (%)            | 43.400        | 3.184   | 44.467      | 0.764   | 43.125      | 3.097   | 46.000       | 1.268   |
| PLT (Thousands/uL) | 892.0         | 132.7   | 847.7       | 163.4   | 754.8       | 69.2    | 845.5        | 23.1    |
| MCV (fL)           | 61.075        | 4.291   | 63.733      | 2.419   | 65.100      | 0.702   | 63.375       | 2.520   |
| MCH (pg)           | 19.900        | 0.883   | 20.867      | 0.416   | 19.400      | 1.052   | 20.025       | 0.465   |
| MCHC (g/dL)        | 32.600        | 1.249   | 32.800      | 1.744   | 29.825      | 1.803*  | 31.625       | 0.670   |
| RDW (%)            | 15.775        | 0.457   | 15.433      | 0.306   | 14.975      | 0.395*  | 15.700       | 0.804   |
| MPV (fL)           | 5.800         | 0.294   | 5.733       | 0.351   | 5.525       | 0.250   | 5.650        | 0.300   |
| PDW (%)            | 20.850        | 1.348   | 18.800      | 1.054   | 19.175      | 0.624   | 20.125       | 0.538   |
| Female             | Mean          | SD      | Mean        | SD      | Mean        | SD      | Mean         | SD      |
| WBC (Thousands/uL) | 12.380        | 0.885   | 11.535      | 1.870   | 13.750      | 0.1717* | 16.500       | 3.159*  |
| Neutrophil (#)     | 4.640         | 1.587   | 3.728       | 0.995   | 3.878       | 1.163   | 4.260        | 0.486   |
| Neutrophil (%)     | 37.065        | 10.198  | 31.995      | 5.028   | 28.220      | 8.621   | 27.210       | 9.751   |
| Lymphocytes (#)    | 7.143         | 0.959   | 7.308       | 1.078   | 9.208       | 1.333*  | 11.465       | 3.460   |
| Lymphocytes (%)    | 58.098        | 9.908   | 63.660      | 6.055   | 66.940      | 9.489   | 68.108       | 9.569   |
| Monocytes (#)      | 0.578         | 0.113   | 0.485       | 0.159   | 0.650       | 0.250   | 0.745        | 0.175   |
| Monocytes (%)      | 4.670         | 0.804   | 4.215       | 1.464   | 4.708       | 1.820   | 4.490        | 0.321   |
| Eosinophils (#)    | 0.018         | 0.010   | 0.013       | 0.005   | 0.013       | 0.013   | 0.020        | 0.022   |
| Eosinophils (%)    | 0.145         | 0.068   | 0.113       | 0.038   | 0.108       | 0.082   | 0.115        | 0.110   |
| Basophils (#)      | 0.000         | 0.000   | 0.000       | 0.000   | 0.003       | 0.005   | 0.015        | 0.006*  |
| Basophils (%)      | 0.020         | 0.008   | 0.018       | 0.013   | 0.023       | 0.039   | 0.080        | 0.0383* |
| RBC (Million/uL)   | 6.765         | 0.111   | 6.160       | 0.361*  | 6.520       | 0.316   | 6.415        | 0.1473* |
| HB (g/dL)          | 13.675        | 0.171   | 12.850      | 0.387*  | 12.450      | 0.625*  | 13.400       | 0.327   |
| HCT (%)            | 42.525        | 1.898   | 40.500      | 1.753   | 41.925      | 2.027   | 41.775       | 2.201   |
| PLT (Thousands/uL) | 1004.500      | 183.297 | 790.500     | 184.385 | 818.750     | 60.191  | 736.250      | 139.471 |
| MCV (fL)           | 62.925        | 3.762   | 65.825      | 2.442   | 64.325      | 0.665   | 65.150       | 1.982   |
| MCH (pg)           | 20.225        | 0.369   | 20.900      | 1.364   | 19.075      | 0.15*   | 20.875       | 0.793   |
| MCHC (g/dL)        | 32.200        | 1.547   | 31.750      | 1.529   | 29.700      | 0.356*  | 32.175       | 2.086   |
| RDW (%)            | 14.875        | 0.263   | 14.200      | 0.497   | 14.775      | 0.655   | 14.400       | 0.000*  |
| MPV (fL)           | 5.950         | 0.603   | 5.525       | 0.377   | 5.600       | 0.400   | 5.700        | 0.560   |
| PDW (%)            | 18.875        | 1.715   | 18.950      | 1.173   | 18.800      | 0.726   | 19.000       | 0.883   |

**Table S1A. Hematology measurements.** The complete blood counts results for each group under early time points (A) were averaged and the standard deviations displayed. The standard deviations with a p<0.05 compared to the same sex controls under respective early or late time points are annotated with an asterisk and highlighted.

| B.                 | Group 5      |           | Group 6     |           | Group 7     |           | Group 8     |           |
|--------------------|--------------|-----------|-------------|-----------|-------------|-----------|-------------|-----------|
|                    | Control late |           | D-FAC late  |           | L-FAC late  |           | L-FMAC late |           |
| Male               | Mean         | SD        | Mean        | SD        | Mean        | SD        | Mean        | SD        |
| WBC (Thousands/uL) | 16.570       | 1.921     | 14.187      | 4.223     | 15.145      | 2.031     | 14.520      | 3.454     |
| Neutrophil (#)     | 3.823        | 0.655     | 5.297       | 2.618     | 4.678       | 2.504     | 4.837       | 1.384     |
| Neutrophil (%)     | 23.113       | 3.247     | 35.847      | 10.995    | 30.008      | 12.174    | 33.233      | 3.5331*   |
| Lymphocytes (#)    | 11.938       | 1.642     | 8.467       | 1.934     | 9.758       | 1.424     | 9.117       | 2.220     |
| Lymphocytes (%)    | 71.980       | 3.756     | 61.000      | 9.792     | 65.288      | 11.803    | 62.713      | 3.5329*   |
| Monocytes (#)      | 0.793        | 0.279     | 0.400       | 0.079     | 0.678       | 0.156     | 0.523       | 0.035     |
| Monocytes (%)      | 4.800        | 1.592     | 2.953       | 1.050     | 4.503       | 1.054     | 3.747       | 0.778     |
| Eosinophils (#)    | 0.018        | 0.017     | 0.020       | 0.010     | 0.030       | 0.022     | 0.033       | 0.012     |
| Eosinophils (%)    | 0.103        | 0.091     | 0.173       | 0.153     | 0.188       | 0.104     | 0.267       | 0.126     |
| Basophils (#)      | 0.000        | 0.000     | 0.003       | 0.006     | 0.003       | 0.005     | 0.003       | 0.006     |
| Basophils (%)      | 0.003        | 0.005     | 0.033       | 0.035     | 0.010       | 0.014     | 0.033       | 0.0153*   |
| RBC (Million/uL)   | 7.843        | 0.649     | 7.910       | 0.195     | 8.243       | 0.484     | 8.133       | 0.291     |
| HB (g/dL)          | 14.875       | 1.135     | 14.833      | 0.681     | 15.050      | 0.507     | 15.433      | 0.473     |
| HCT (%)            | 47.425       | 2.571     | 47.967      | 1.680     | 49.800      | 1.117     | 49.900      | 2.512     |
| PLT (Thousands/uL) | 855.3        | 87.9      | 818.3       | 115.8     | 818.5       | 119.8     | 803.7       | 22.7      |
| MCV (fL)           | 60.600       | 2.245     | 60.633      | 1.677     | 60.525      | 2.765     | 61.300      | 1.015     |
| MCH (pg)           | 18.975       | 1.053     | 18.733      | 0.493     | 18.300      | 0.726     | 18.967      | 0.116     |
| MCHC (g/dL)        | 31.350       | 1.277     | 30.900      | 0.781     | 30.250      | 0.806     | 30.967      | 0.666     |
| RDW (%)            | 15.400       | 1.117     | 15.533      | 1.050     | 15.650      | 0.444     | 16.367      | 0.231     |
| MPV (fL)           | 5.925        | 0.206     | 5.900       | 0.100     | 6.000       | 0.383     | 5.867       | 0.503     |
| PDW (%)            | 18.975       | 0.814     | 19.967      | 1.168     | 19.900      | 1.137     | 19.433      | 1.234     |
| <b>Female</b>      | <b>Mean</b>  | <b>SD</b> | <b>Mean</b> | <b>SD</b> | <b>Mean</b> | <b>SD</b> | <b>Mean</b> | <b>SD</b> |
| WBC (Thousands/uL) | 14.310       | 3.420     | 10.970      | 1.354     | 10.670      | 3.273     | 12.695      | 3.507     |
| Neutrophil (#)     | 3.460        | 1.460     | 2.838       | 0.771     | 2.485       | 0.453     | 4.828       | 3.022     |
| Neutrophil (%)     | 23.568       | 5.218     | 26.308      | 8.684     | 25.028      | 8.134     | 39.583      | 26.548    |
| Lymphocytes (#)    | 10.243       | 1.828     | 7.693       | 1.809     | 7.768       | 3.020     | 7.340       | 4.245     |
| Lymphocytes (%)    | 72.280       | 4.778     | 69.585      | 10.080    | 70.913      | 9.541     | 56.303      | 26.138    |
| Monocytes (#)      | 0.583        | 0.313     | 0.410       | 0.102     | 0.403       | 0.239     | 0.505       | 0.191     |
| Monocytes (%)      | 3.975        | 1.551     | 3.805       | 1.241     | 3.948       | 2.034     | 3.928       | 0.753     |
| Eosinophils (#)    | 0.023        | 0.013     | 0.025       | 0.024     | 0.013       | 0.015     | 0.020       | 0.012     |
| Eosinophils (%)    | 0.173        | 0.074     | 0.238       | 0.196     | 0.110       | 0.081     | 0.138       | 0.079     |
| Basophils (#)      | 0.000        | 0.000     | 0.008       | 0.010     | 0.000       | 0.000     | 0.005       | 0.010     |
| Basophils (%)      | 0.005        | 0.006     | 0.065       | 0.090     | 0.003       | 0.005     | 0.048       | 0.069     |
| RBC (Million/uL)   | 7.268        | 0.319     | 8.100       | 0.431*    | 7.835       | 0.380     | 8.070       | 0.3232*   |
| HB (g/dL)          | 13.875       | 0.591     | 15.000      | 0.663*    | 14.575      | 0.732     | 15.375      | 0.9605*   |
| HCT (%)            | 44.400       | 3.080     | 50.900      | 1.806*    | 47.625      | 2.399     | 48.775      | 2.3286*   |
| PLT (Thousands/uL) | 903.5        | 109.2     | 843.5       | 29.2      | 799.3       | 69.6      | 883.3       | 146.4     |
| MCV (fL)           | 61.050       | 2.009     | 62.950      | 2.275     | 60.800      | 1.635     | 60.450      | 3.064     |
| MCH (pg)           | 19.100       | 0.927     | 18.550      | 0.603     | 18.600      | 1.023     | 19.075      | 1.506     |
| MCHC (g/dL)        | 31.325       | 1.588     | 29.450      | 0.592     | 30.650      | 1.443     | 31.525      | 1.187     |
| RDW (%)            | 14.900       | 0.548     | 14.775      | 0.640     | 14.750      | 0.379     | 15.200      | 0.673     |
| MPV (fL)           | 5.750        | 0.129     | 5.775       | 0.299     | 5.800       | 0.529     | 5.775       | 0.287     |
| PDW (%)            | 19.050       | 0.785     | 17.850      | 0.705     | 17.950      | 0.933     | 19.800      | 1.344     |

**Table S1B. Hematology measurements.** The complete blood counts results for each group under late time points (**B**) were averaged and the standard deviations displayed. The standard deviations with a p<0.05 compared to the same sex controls under respective early or late time points are annotated with an asterisk and highlighted.



| A.                 | Group 1       |         | Group 2     |         | Group 3     |         | Group 4      |         |
|--------------------|---------------|---------|-------------|---------|-------------|---------|--------------|---------|
|                    | Control early |         | D-FAC early |         | L-FAC early |         | L-FMAC early |         |
| Male               | Mean          | SD      | Mean        | SD      | Mean        | SD      | Mean         | SD      |
| TPROT (g/dl)       | 5.650         | 0.351   | 6.100       | 0.200   | 5.575       | 0.287   | 6.200        | 0.245*  |
| ALT (U/L)          | 54.000        | 16.310  | 45.667      | 5.508   | 43.750      | 7.089   | 47.000       | 11.547  |
| AST (U/L)          | 79.000        | 24.752  | 76.333      | 3.215   | 64.750      | 4.272   | 86.250       | 9.912   |
| LDH (U/L)          | 173.500       | 118.604 | 223.333     | 94.511  | 134.250     | 109.837 | 205.250      | 40.508  |
| CK (U/L)           | 264.250       | 116.783 | 292.000     | 20.298  | 168.750     | 39.399  | 272.250      | 117.179 |
| BUN (mg/dl)        | 16.250        | 3.304   | 13.667      | 1.155   | 16.250      | 1.500   | 16.750       | 2.062   |
| CHOL (mg/dl)       | 58.500        | 8.888   | 64.000      | 17.521  | 63.250      | 6.946   | 71.750       | 5.7951* |
| ALP (U/L)          | 276.250       | 52.182  | 234.333     | 51.481  | 248.750     | 45.184  | 261.000      | 66.648  |
| TBILI (mg/dl)      | 0.175         | 0.050   | 0.200       | 0.000   | 0.225       | 0.050   | 0.325        | 0.0957* |
| GLU (mg/dl)        | 213.750       | 72.853  | 160.333     | 18.339  | 161.500     | 5.260   | 179.250      | 23.172  |
| PHOS (mg/dl)       | 6.900         | 0.294   | 7.567       | 0.289*  | 7.225       | 0.499   | 7.850        | 0.802   |
| CA (mg/dl)         | 10.000        | 0.432   | 9.800       | 0.300   | 9.675       | 0.275   | 10.000       | 0.258   |
| CO2 (mEq/L)        | 24.475        | 1.710   | 24.800      | 1.868   | 22.375      | 0.320   | 22.775       | 0.591   |
| CREA (mg/dl)       | 0.425         | 0.050   | 0.400       | 0.000   | 0.325       | 0.05*   | 0.375        | 0.050   |
| DBILI (mg/dl)      | 0.200         | 0.000   | 0.2         | 0.1     | 0.275       | 0.096   | 0.500        | 0.1633* |
| ALB (g/ul)         | 2.850         | 0.129   | 3.033       | 0.153   | 2.925       | 0.206   | 3.100        | 0.0816* |
| GGT (U/L)          | 1.500         | 1.000   | 1.667       | 0.577   | 0.750       | 0.500   | 1.500        | 1.000   |
| Sodium (mmol/L)    | 134.533       | 3.667   | 136.967     | 2.155   | 136.480     | 2.630   | 137.050      | 3.181   |
| Potassium (mmol/L) | 5.777         | 0.283   | 6.037       | 0.578   | 5.648       | 0.340   | 6.058        | 0.508   |
| Chloride (mmol/L)  | 98.800        | 3.483   | 100.067     | 2.470   | 101.230     | 1.873   | 100.850      | 2.559   |
| Female             | Mean          | SD      | Mean        | SD      | Mean        | SD      | Mean         | SD      |
| TPROT (g/dl)       | 6.200         | 0.392   | 6.000       | 0.141   | 5.850       | 0.311   | 6.425        | 0.126   |
| ALT (U/L)          | 49.250        | 21.899  | 40.000      | 3.830   | 38.500      | 4.435   | 42.250       | 7.500   |
| AST (U/L)          | 78.250        | 26.043  | 74.500      | 5.686   | 66.500      | 6.137   | 81.250       | 8.461   |
| LDH (U/L)          | 164.750       | 59.707  | 248.750     | 142.738 | 138.000     | 71.745  | 226.750      | 42.813  |
| CK (U/L)           | 218.500       | 33.551  | 276.000     | 128.356 | 155.000     | 60.194  | 234.500      | 66.556  |
| BUN (mg/dl)        | 13.500        | 1.915   | 15.000      | 2.160   | 15.250      | 0.957   | 15.500       | 1.732   |
| CHOL (mg/dl)       | 81.250        | 12.971  | 66.750      | 9.323   | 74.000      | 6.633   | 69.000       | 8.525   |
| ALP (U/L)          | 139.250       | 8.342   | 168.500     | 31.268  | 165.750     | 46.090  | 176.000      | 60.503  |
| TBILI (mg/dl)      | 0.275         | 0.150   | 0.300       | 0.000   | 0.175       | 0.050   | 0.300        | 0.000   |
| GLU (mg/dl)        | 195.250       | 30.038  | 205.500     | 57.911  | 175.000     | 27.665  | 200.000      | 52.058  |
| PHOS (mg/dl)       | 6.475         | 0.457   | 7.425       | 0.714   | 6.475       | 0.403   | 7.075        | 0.427   |
| CA (mg/dl)         | 10.175        | 0.206   | 10.175      | 0.287   | 9.800       | 0.523   | 10.775       | 0.699   |
| CO2 (mEq/L)        | 23.600        | 0.698   | 23.550      | 0.858   | 22.150      | 0.971   | 22.350       | 1.139   |
| CREA (mg/dl)       | 0.400         | 0.000   | 0.500       | 0.0816* | 0.325       | 0.05*   | 0.375        | 0.050   |
| DBILI (mg/dl)      | 0.300         | 0.200   | 0.375       | 0.096   | 0.175       | 0.050   | 0.325        | 0.050   |
| ALB (g/ul)         | 3.200         | 0.183   | 3.100       | 0.082   | 3.200       | 0.294   | 3.350        | 0.100   |
| GGT (U/L)          | 0.750         | 0.500   | 2.250       | 0.957*  | 2.250       | 1.258   | 1.750        | 1.708   |
| Sodium (mmol/L)    | 136.930       | 1.155   | 137.250     | 1.529   | 135.230     | 2.604   | 135.480      | 1.903   |
| Potassium (mmol/L) | 5.700         | 0.099   | 5.473       | 0.289   | 5.228       | 0.362   | 5.315        | 0.423   |
| Chloride (mmol/L)  | 101.830       | 1.172   | 102.600     | 1.960   | 100.580     | 2.300   | 99.900       | 1.637   |

**Table S2A. Serum chemistry measurements.** The serum chemistry results for each group under early time points (A) were averaged and the standard deviations displayed. The standard deviations with a  $p < 0.05$  compared to the same sex controls under respective early or late time points are annotated with an asterisk and highlighted.

B.

|                    | Group 5      |        | Group 6    |         | Group 7    |         | Group 8     |         |
|--------------------|--------------|--------|------------|---------|------------|---------|-------------|---------|
|                    | Control late |        | D-FAC late |         | L-FAC late |         | L-FMAC late |         |
| Male               | Mean         | SD     | Mean       | SD      | Mean       | SD      | Mean        | SD      |
| TPROT (g/dl)       | 5.550        | 0.342  | 5.267      | 0.379   | 5.750      | 0.100   | 6.175       | 0.1708* |
| ALT (U/L)          | 41.750       | 3.202  | 38.000     | 2.646   | 41.000     | 2.944   | 42.250      | 4.349   |
| AST (U/L)          | 66.750       | 7.932  | 69.333     | 8.083   | 66.500     | 4.509   | 64.500      | 2.381   |
| LDH (U/L)          | 146.750      | 60.252 | 194.000    | 80.988  | 204.250    | 61.446  | 119.000     | 24.235  |
| CK (U/L)           | 189.750      | 57.308 | 204.000    | 54.672  | 186.500    | 41.008  | 161.000     | 14.765  |
| BUN (mg/dl)        | 12.500       | 1.000  | 14.000     | 1.732   | 14.750     | 1.893   | 16.000      | 1.826*  |
| CHOL (mg/dl)       | 56.000       | 4.397  | 50.333     | 0.577   | 63.000     | 13.976  | 62.250      | 9.323   |
| ALP (U/L)          | 206.250      | 27.536 | 220.000    | 66.573  | 200.250    | 55.614  | 249.500     | 12.369* |
| TBILI (mg/dl)      | 0.150        | 0.058  | 0.233      | 0.058   | 0.250      | 0.058   | 0.150       | 0.058   |
| GLU (mg/dl)        | 191.250      | 15.392 | 174.667    | 12.583  | 194.250    | 19.500  | 182.250     | 9.912   |
| PHOS (mg/dl)       | 7.250        | 0.526  | 6.733      | 0.569   | 6.400      | 0.606   | 7.125       | 0.275   |
| CA (mg/dl)         | 9.575        | 0.050  | 9.800      | 0.400   | 9.575      | 0.427   | 10.275      | 0.1500* |
| CO2 (mEq/L)        | 24.300       | 0.938  | 22.433     | 0.289*  | 25.350     | 0.480   | 24.225      | 1.072   |
| CREA (mg/dl)       | 0.400        | 0.000  | 0.400      | 0.000   | 0.400      | 0.000   | 0.375       | 0.050   |
| DBILI (mg/dl)      | 0.200        | 0.082  | 0.367      | 0.0577* | 0.275      | 0.096   | 0.250       | 0.058   |
| ALB (g/ul)         | 2.750        | 0.129  | 2.833      | 0.115   | 2.800      | 0.000   | 2.975       | 0.1258* |
| GGT (U/L)          | 1.250        | 0.500  | 0.667      | 0.577   | 2.750      | 0.957*  | 3.000       | 0.000*  |
| Sodium (mmol/L)    | 130.467      | 0.833  | 136.000    | 2.879*  | 135.500    | 4.468   | 139.180     | 5.140   |
| Potassium (mmol/L) | 5.650        | 0.671  | 5.990      | 0.497   | 5.373      | 0.578   | 5.590       | 0.262   |
| Chloride (mmol/L)  | 96.933       | 0.551  | 100.533    | 1.0214* | 98.125     | 2.069   | 101.380     | 3.717   |
| Female             | Mean         | SD     | Mean       | SD      | Mean       | SD      | Mean        | SD      |
| TPROT (g/dl)       | 5.900        | 0.082  | 5.475      | 0.506   | 6.225      | 0.2062* | 6.133       | 0.289   |
| ALT (U/L)          | 41.500       | 2.646  | 40.000     | 12.247  | 51.250     | 4.113*  | 42.000      | 4.359   |
| AST (U/L)          | 63.000       | 7.394  | 68.750     | 17.017  | 72.000     | 8.042   | 68.667      | 4.042   |
| LDH (U/L)          | 192.000      | 97.081 | 187.250    | 90.842  | 174.000    | 65.218  | 144.670     | 107.156 |
| CK (U/L)           | 207.250      | 58.858 | 194.000    | 30.908  | 161.000    | 14.095  | 166.330     | 39.514  |
| BUN (mg/dl)        | 13.250       | 0.500  | 15.000     | 2.582   | 14.000     | 4.083   | 14.667      | 0.5774* |
| CHOL (mg/dl)       | 78.250       | 8.995  | 68.500     | 17.972  | 73.500     | 11.790  | 71.000      | 12.767  |
| ALP (U/L)          | 168.250      | 24.527 | 118.250    | 23.486* | 118.500    | 24.83*  | 158.330     | 11.719  |
| TBILI (mg/dl)      | 0.200        | 0.000  | 0.200      | 0.000   | 0.200      | 0.082   | 0.200       | 0.000   |
| GLU (mg/dl)        | 181.250      | 4.646  | 213.000    | 35.071  | 173.500    | 11.387  | 176.670     | 15.308  |
| PHOS (mg/dl)       | 6.175        | 0.386  | 6.625      | 0.544   | 6.000      | 0.497   | 6.367       | 0.503   |
| CA (mg/dl)         | 9.700        | 0.245  | 10.125     | 0.435   | 10.125     | 0.670   | 10.200      | 0.1732* |
| CO2 (mEq/L)        | 23.725       | 1.106  | 21.625     | 1.684   | 25.300     | 1.510   | 25.067      | 0.322   |
| CREA (mg/dl)       | 0.400        | 0.000  | 0.450      | 0.058   | 0.425      | 0.050   | 0.400       | 0.000   |
| DBILI (mg/dl)      | 0.200        | 0.000  | 0.225      | 0.050   | 0.225      | 0.096   | 0.233       | 0.058   |
| ALB (g/ul)         | 3.050        | 0.100  | 3.000      | 0.294   | 3.200      | 0.141   | 3.167       | 0.058   |
| GGT (U/L)          | 1.500        | 1.000  | 1.500      | 1.291   | 2.750      | 0.957   | 2.333       | 1.528   |
| Sodium (mmol/L)    | 135.500      | 0.625  | 132.675    | 7.424   | 135.080    | 2.830   | 136.270     | 2.026   |
| Potassium (mmol/L) | 4.920        | 0.281  | 6.220      | 1.435   | 4.878      | 0.357   | 5.120       | 0.571   |
| Chloride (mmol/L)  | 99.000       | 0.700  | 96.650     | 1.760   | 97.075     | 0.885*  | 98.433      | 1.286   |

**Table S2B. Serum chemistry measurements.** The serum chemistry results for each group under late time points (**B**) were averaged and the standard deviations displayed. The standard deviations with a p<0.05 compared to the same sex controls under respective early or late time points are annotated with an asterisk and highlighted.

A.

|                               | Group 1<br>Control early |        | Group 2<br>D-FAC early |        | Group 3<br>L-FAC early |        | Group 4<br>L-FMAC early |        |
|-------------------------------|--------------------------|--------|------------------------|--------|------------------------|--------|-------------------------|--------|
|                               | Mean                     | SD     | Mean                   | SD     | Mean                   | SD     | Mean                    | SD     |
| <b>Male</b>                   |                          |        |                        |        |                        |        |                         |        |
| Body wt                       | 351.833                  | 29.747 | 301.943                | 29.404 | 390.125                | 14.463 | 368.960                 | 20.590 |
| Liver wt                      | 17.860                   | 1.985  | 13.557                 | 1.83*  | 17.213                 | 1.381  | 18.498                  | 1.244  |
| Spleen wt                     | 0.655                    | 0.087  | 0.687                  | 0.096  | 1.135                  | 0.507  | 0.728                   | 0.097  |
| Pancreas wt                   | 0.978                    | 0.177  | 0.933                  | 0.395  | 1.455                  | 0.262* | 1.093                   | 0.205  |
| Rt. Adrenal wt                | 0.053                    | 0.005  | 0.043                  | 0.015  | 0.045                  | 0.010  | 0.045                   | 0.006  |
| Lt. Adrenal wt                | 0.045                    | 0.017  | 0.047                  | 0.006  | 0.045                  | 0.010  | 0.045                   | 0.010  |
| Rt. Kidney wt                 | 1.910                    | 0.534  | 1.650                  | 0.060  | 1.803                  | 0.107  | 1.798                   | 0.317  |
| Lt. Kidney wt                 | 1.870                    | 0.429  | 1.703                  | 0.218  | 1.815                  | 0.139  | 1.820                   | 0.310  |
| Thymus wt                     | 0.615                    | 0.137  | 0.483                  | 0.101  | 0.710                  | 0.083  | 0.593                   | 0.155  |
| Brain wt                      | 2.155                    | 0.120  | 2.120                  | 0.173  | 2.070                  | 0.108  | 2.083                   | 0.091  |
| Heart wt 1                    | 2.045                    | 0.218  | 1.270                  | 0.32*  | 1.738                  | 0.522  | 1.793                   | 0.118  |
| Heart wt 2                    | 1.390                    | 0.200  | 1.400                  | 0.180  | N/A                    | N/A    | N/A                     | N/A    |
| Rt. Testis wt                 | 2.208                    | 0.217  | 2.107                  | 0.120  | 2.175                  | 0.089  | 2.213                   | 0.075  |
| Lt. Testis wt                 | 2.205                    | 0.150  | 2.177                  | 0.159  | 2.190                  | 0.132  | 2.233                   | 0.200  |
| Seminal vesicle<br>+ bladder  | 2.140                    | 0.119  | 2.217                  | 0.125  | 2.398                  | 0.253  | 2.648                   | 0.477  |
| <b>Female</b>                 |                          |        |                        |        |                        |        |                         |        |
| Body wt                       | 219.848                  | 6.178  | 219.950                | 10.483 | 225.280                | 8.619  | 216.138                 | 12.352 |
| Liver wt                      | 10.850                   | 0.879  | 8.990                  | 0.99*  | 9.193                  | 0.358* | 10.173                  | 1.312  |
| Spleen wt                     | 0.433                    | 0.056  | 0.528                  | 0.074  | 0.485                  | 0.031  | 0.515                   | 0.047  |
| Pancreas wt                   | 0.888                    | 0.142  | 0.988                  | 0.294  | 0.678                  | 0.094  | 0.735                   | 0.087  |
| Rt. Adrenal wt                | 0.038                    | 0.005  | 0.050                  | 0.01*  | 0.045                  | 0.030  | 0.048                   | 0.015  |
| Lt. Adrenal wt                | 0.035                    | 0.006  | 0.053                  | 0.01*  | 0.050                  | 0.026  | 0.050                   | 0.016  |
| Rt. Kidney wt                 | 1.173                    | 0.036  | 1.075                  | 0.100  | 1.130                  | 0.063  | 1.133                   | 0.067  |
| Lt. Kidney wt                 | 1.165                    | 0.105  | 1.058                  | 0.128  | 1.110                  | 0.072  | 1.095                   | 0.111  |
| Thymus wt                     | 0.540                    | 0.127  | 0.560                  | 0.203  | 0.553                  | 0.057  | 0.490                   | 0.114  |
| Brain wt                      | 1.905                    | 0.112  | 2.000                  | 0.154  | 1.958                  | 0.112  | 1.918                   | 0.043  |
| Heart wt 1                    | 1.323                    | 0.146  | 1.043                  | 0.16*  | 1.008                  | 0.037* | 1.183                   | 0.124  |
| Heart wt 2                    | 0.930                    | 0.200  | 0.900                  | 0.110  | N/A                    | N/A    | N/A                     | N/A    |
| Uterus, ovarian<br>bladder wt | 1.218                    | 0.226  | 1.185                  | 0.078  | 1.085                  | 0.047  | 1.110                   | 0.173  |

**Table S3A. Necropsy- organ weights.** The necropsy data results for each group under early time points (A) were averaged and the standard deviations displayed. The standard deviations with a  $p < 0.05$  compared to the same sex controls under respective early or late time points are annotated with an asterisk and highlighted.

B.

|                               | Group 5<br>Control late |        | Group 6<br>D-FAC late |        | Group 7<br>L-FAC late |        | Group 8<br>L-FMAC late |        |
|-------------------------------|-------------------------|--------|-----------------------|--------|-----------------------|--------|------------------------|--------|
|                               | Mean                    | SD     | Mean                  | SD     | Mean                  | SD     | Mean                   | SD     |
| <b>Male</b>                   |                         |        |                       |        |                       |        |                        |        |
| Body wt                       | 417.900                 | 24.876 | 412.377               | 28.378 | 411.750               | 8.057  | 421.250                | 16.681 |
| Liver wt                      | 17.653                  | 1.407  | 17.963                | 1.812  | 15.828                | 1.917  | 16.993                 | 0.759  |
| Spleen wt                     | 0.815                   | 0.143  | 0.733                 | 0.074  | 0.810                 | 0.106  | 0.890                  | 0.075  |
| Pancreas wt                   | 1.150                   | 0.176  | 1.183                 | 0.055  | 1.160                 | 0.181  | 1.243                  | 0.052  |
| Rt. Adrenal wt                | 0.040                   | 0.012  | 0.040                 | 0.017  | 0.048                 | 0.010  | 0.040                  | 0.012  |
| Lt. Adrenal wt                | 0.038                   | 0.010  | 0.043                 | 0.025  | 0.043                 | 0.005  | 0.035                  | 0.010  |
| Rt. Kidney wt                 | 1.925                   | 0.284  | 1.880                 | 0.174  | 1.948                 | 0.142  | 1.978                  | 0.185  |
| Lt. Kidney wt                 | 1.835                   | 0.295  | 1.883                 | 0.093  | 1.880                 | 0.134  | 1.798                  | 0.156  |
| Thymus wt                     | 0.573                   | 0.113  | 0.490                 | 0.123  | 0.500                 | 0.057  | 0.530                  | 0.062  |
| Brain wt                      | 2.103                   | 0.043  | 2.037                 | 0.025  | 2.168                 | 0.133  | 2.143                  | 0.031  |
| Heart wt 1                    | 1.450                   | 0.181  | 1.540                 | 0.200  | 1.488                 | 0.046  | 1.528                  | 0.138  |
| Heart wt 2                    | 1.478                   | 0.165  | 1.432                 | 0.216  | N/A                   | N/A    | N/A                    | N/A    |
| Rt. Testis wt                 | 2.213                   | 0.251  | 2.433                 | 0.101  | 2.463                 | 0.198  | 2.533                  | 0.132  |
| Lt. Testis wt                 | 2.308                   | 0.220  | 2.173                 | 0.431  | 2.403                 | 0.129  | 2.430                  | 0.209  |
| Seminal vesicle<br>+ bladder  | 3.145                   | 0.388  | 2.563                 | 0.100  | 3.295                 | 0.816  | 2.933                  | 0.367  |
| <b>Female</b>                 |                         |        |                       |        |                       |        |                        |        |
| Body wt                       | 244.840                 | 11.040 | 230.883               | 10.648 | 260.045               | 13.516 | 259.773                | 3.440  |
| Liver wt                      | 10.350                  | 1.670  | 9.490                 | 1.146  | 11.338                | 1.986  | 11.383                 | 1.580  |
| Spleen wt                     | 0.540                   | 0.090  | 0.445                 | 0.026  | 0.615                 | 0.079  | 0.597                  | 0.050  |
| Pancreas wt                   | 0.900                   | 0.190  | 0.773                 | 0.035  | 0.908                 | 0.123  | 0.903                  | 0.095  |
| Rt. Adrenal wt                | 0.050                   | 0.010  | 0.043                 | 0.010  | 0.043                 | 0.010  | 0.047                  | 0.012  |
| Lt. Adrenal wt                | 0.050                   | 0.020  | 0.045                 | 0.006  | 0.043                 | 0.010  | 0.050                  | 0.010  |
| Rt. Kidney wt                 | 1.210                   | 0.140  | 1.113                 | 0.140  | 1.325                 | 0.114  | 1.253                  | 0.061  |
| Lt. Kidney wt                 | 1.140                   | 0.140  | 0.840                 | 0.472  | 1.208                 | 0.083  | 1.273                  | 0.070  |
| Thymus wt                     | 0.540                   | 0.130  | 0.450                 | 0.089  | 0.545                 | 0.052  | 0.463                  | 0.091  |
| Brain wt                      | 1.880                   | 0.120  | 1.970                 | 0.093  | 1.970                 | 0.032  | 1.953                  | 0.031  |
| Heart wt 1                    | 1.120                   | 0.150  | 0.895                 | 0.075* | 1.138                 | 0.235  | 1.150                  | 0.288  |
| Heart wt 2                    | 0.927                   | 0.094  | 0.895                 | 0.060  | N/A                   | N/A    | N/A                    | N/A    |
| Uterus, ovarian<br>bladder wt | 1.500                   | 0.410  | 1.200                 | 0.298  | 1.370                 | 0.341  | 1.413                  | 0.169  |

**Table S3B. Necropsy- organ weights.** The necropsy data results for each group under late time points (**B**) were averaged and the standard deviations displayed. The standard deviations with a  $p < 0.05$  compared to the same sex controls under respective early or late time points are annotated with an asterisk and highlighted.
